# Supplementary material for: Performance evaluation for rapid detection of pan-cancer microsatellite instability with MANTIS
Source: PubMed Central journal article supplement (PMC5352334; doi:10.18632/oncotarget.13918), 2016-12-12
Supplement: oncotarget-08-7452-s001.pdf [file oncotarget-08-7452-s001.pdf]

# Performance evaluation for rapid detection of pan-cancer microsatellite instability with MANTIS

## Supplementary Material

### Supplemental Tables, Figures and Information

**Table S1: A:** Number of samples from each cancer type used for testing and analysis of MSI calling tools. **B:** Breakdown of COAD/READ samples by cancer type and sequencing center. **C:** Breakdown of PRAD samples by sequencing center. WUGSC: Washington University Genome Sequencing Center. BI: Broad Institute of MIT and Harvard. BCM: Baylor College of Medicine. UM: University of Michigan. COAD: Colon Adenocarcinoma. READ: Rectal Adenocarcinoma.

#### A:

| Disease                              | TCGA Abbreviation(s) | MSI-High (MSI-H) | Microsatellite Stable (MSS) | Total | Sequencing center |
|--------------------------------------|----------------------|------------------|-----------------------------|-------|-------------------|
| Colorectal Adenocarcinoma            | COAD/READ            | 38               | 38                          | 76    | Multiple (see B)  |
| Uterine Corpus Endometrial Carcinoma | UCEC                 | 49               | 50                          | 99    | WUGSC             |
| Gastric Adenocarcinoma               | STAD                 | 50               | 50                          | 100   | BI                |
| Esophageal Carcinoma                 | ESCA                 | 2                | 69                          | 71    | BI                |
| Uterine Carcinosarcoma               | UCS                  | 2                | 51                          | 53    | BI                |
| Prostate Adenocarcinoma              | PRAD                 | 1                | 58                          | 59    | Multiple (see C)  |
| Combined                             | –                    | 142              | 316                         | 458   |                   |

#### B:

| TCGA abbreviation | Sequencing Center | MSI-H | MSS | Total |
|-------------------|-------------------|-------|-----|-------|
| COAD              | BCM               | 33    | 18  | 51    |
| COAD              | WUGSC             | 4     | 9   | 13    |
| READ              | BCM               | 1     | 7   | 8     |
| READ              | WUGSC             | 0     | 4   | 4     |

#### C:

| TCGA abbreviation | Sequencing Center | MSI-H | MSS | Total |
|-------------------|-------------------|-------|-----|-------|
| PRAD              | BI                | 1     | 50  | 51    |
| PRAD              | UM                | 0     | 8   | 8     |

**Table S2:** Performance profiling of mSINGS, MSISensor and MANTIS over a representative tumor-normal pair (TCGA-V5-A7RE). In **(A)**, the file size of each BAM and total number of reads after deduplication is listed. In **(B)**, runtime, memory usage, and total disk space used by each tool is listed. Runtime is listed as hours:minutes:seconds. mSINGS runtime does not include baseline generation. As MSISensor and MANTIS support multithreading, one thread and three threads were tested for each.

**A:**

| File                                            | File size (bytes) | Total reads |
|-------------------------------------------------|-------------------|-------------|
| TCGA-V5-A7RE-11A-11D-A351-09.rmdup.bam (normal) | 11554546055       | 82966335    |
| TCGA-V5-A7RE-01A-11D-A351-09.rmdup.bam (tumor)  | 10689033275       | 76367232    |

**B:**

|                                             | mSINGS  | MSISensor 1 thread | MSISensor 3 threads | MANTIS 1 thread | MANTIS 3 threads |
|---------------------------------------------|---------|--------------------|---------------------|-----------------|------------------|
| Runtime                                     | 0:26:44 | 0:04:10            | 0:04:42             | 0:02:56         | 0:02:20          |
| Maximum memory usage                        | 1.48 GB | 38 MB              | 30 MB               | 89 MB           | 108 MB           |
| Disk space (intermediate files and results) | 32 GB   | 2.3 MB             | 2.3 MB              | 896 KB          | 896 KB           |

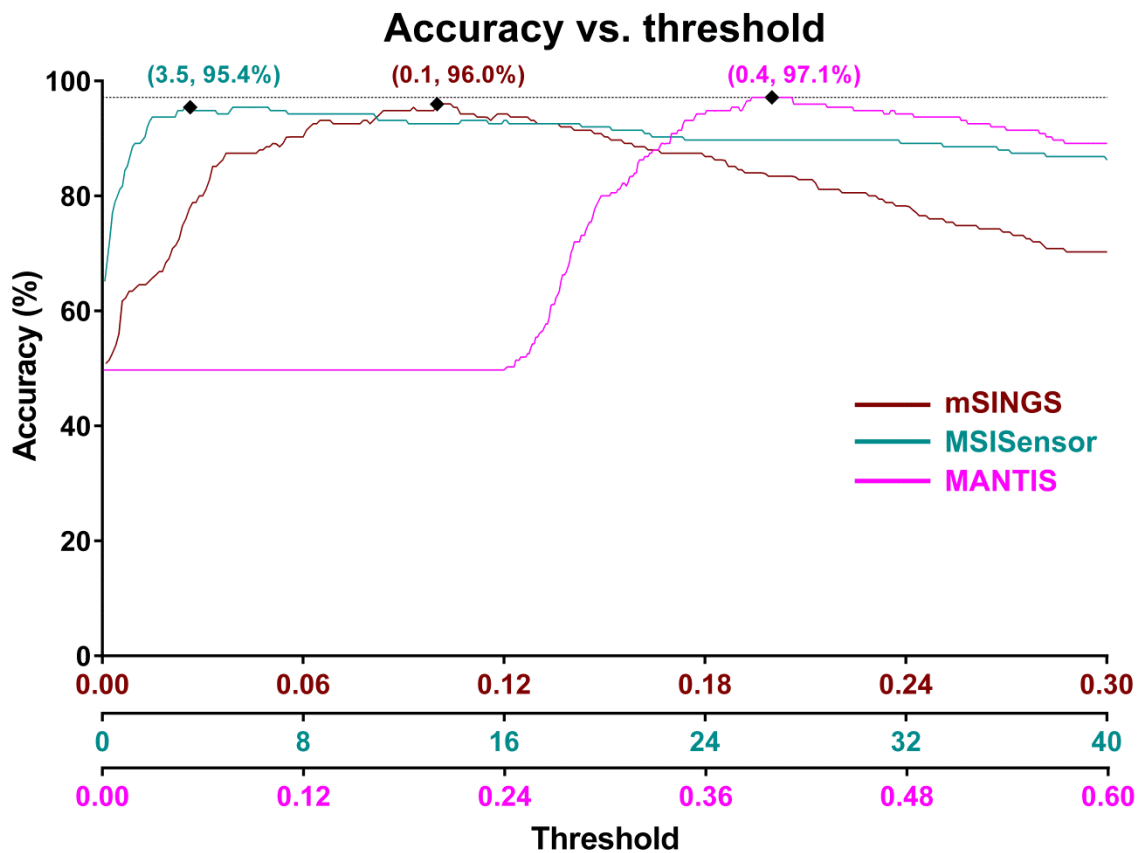

**Figure S1:** Accuracy of mSINGS, MSISensor and MANTIS at a range of thresholds, when tested with the 76 COAD/READ tumor-normal pairs and 99 UCEC tumor-normal pairs. The thresholds for each tool yielding the highest accuracy for the test data are highlighted. For mSINGS, thresholds from 0.001 to 0.3 were evaluated, in increments of 0.001. For MSISensor, thresholds from 0.1 to 40.0 were evaluated, in increments of 0.1. For MANTIS, thresholds from 0.001 to 0.6 were evaluated, in increments of 0.001.

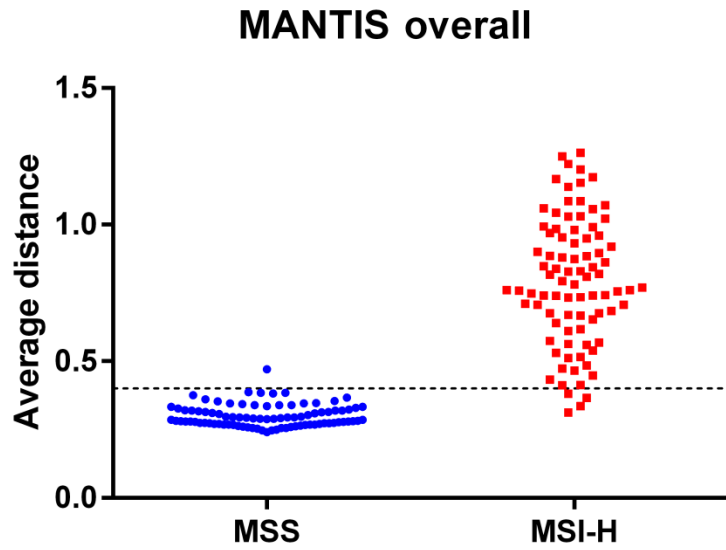

**Figure S2:** The distribution of MSI scores reported by MANTIS for the 76 COAD/READ tumor-normal pairs and 99 UCEC tumor-normal pairs. The dotted line is at the threshold to call a tumor MSI positive.

A:

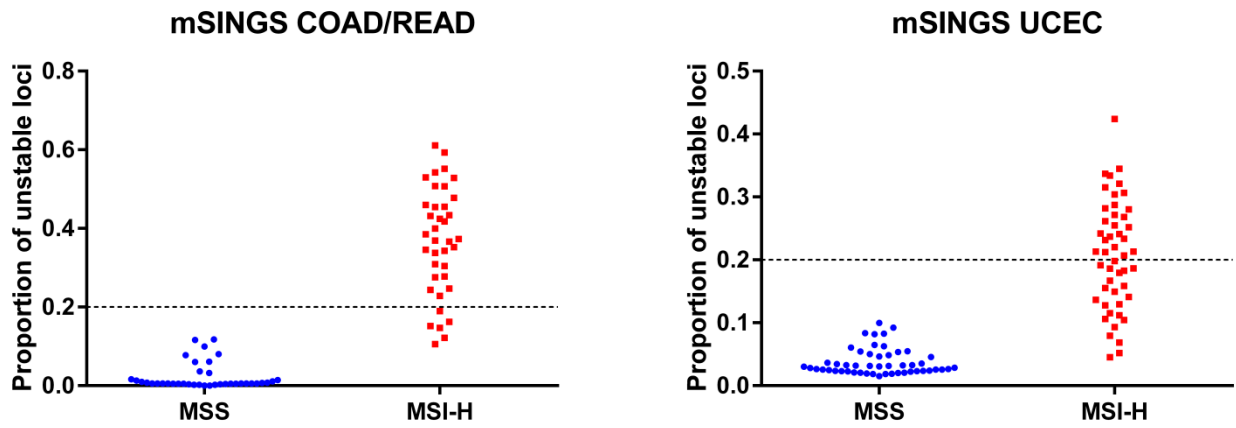

B:

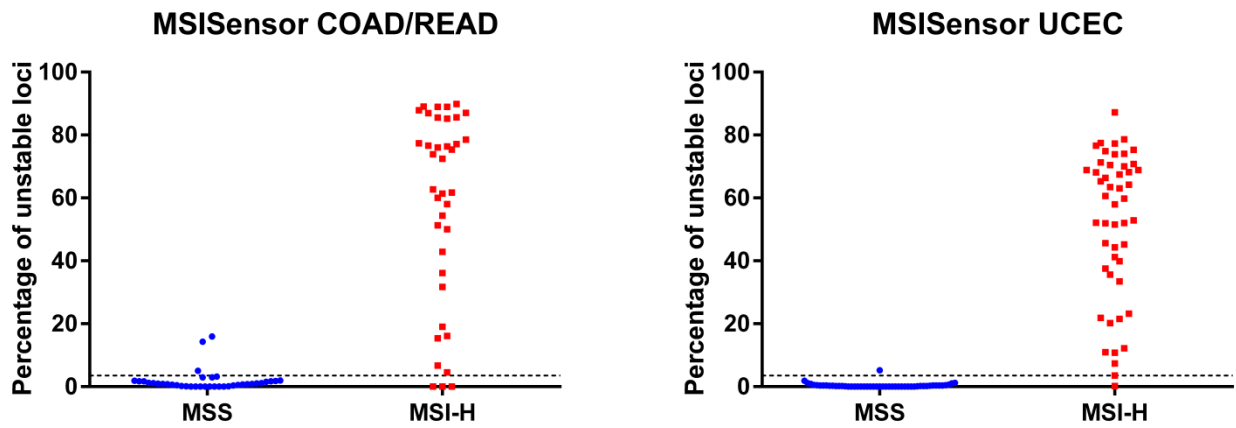

C:

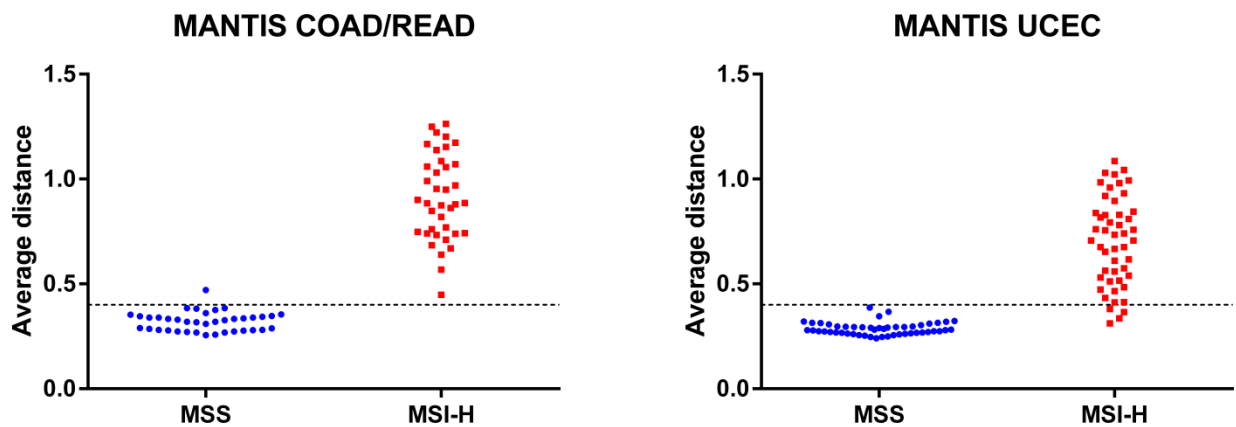

**Figure S3:** The cumulative distribution of MSI scores reported by mSINGS (A), MSISensor (B), and MANTIS (C) for the 76 COAD/READ tumor-normal pairs and 99 UCEC tumor-normal pairs. The dotted lines are at the tools' respective thresholds to call a tumor MSI positive.

**Table S3:** The results of mSINGS, MSISensor and MANTIS over a set of 4 COAD/READ MSI-H tumor-normal pairs (**A**) and 20 UCEC MSI-H samples (**B**) that were sequenced at two different sequencing centers. The Pearson correlation coefficient of the tool scores between sequencing centers is provided for each tumor type and tool. (BI: Broad Institute of MIT and Harvard. BCM: Baylor College of Medicine. WUGSC: Washington University Genome Sequencing Center.)

**A:**

| Tool:          | mSINGS          |        | MSISensor       |       | MANTIS          |        |
|----------------|-----------------|--------|-----------------|-------|-----------------|--------|
|                | BI              | BCM    | BI              | BCM   | BI              | BCM    |
| TCGA-A6-2686   | 0.5802          | 0.3924 | 87.84           | 87.84 | 1.173           | 1.173  |
| TCGA-A6-3809   | 0.4528          | 0.5013 | 77.35           | 77.69 | 0.9693          | 0.9389 |
| TCGA-CK-4951   | 0.4229          | 0.2615 | 61.38           | 61.38 | 0.7698          | 0.7698 |
| TCGA-CM-4746   | 0.4224          | 0.4828 | 62.68           | 63.3  | 0.8617          | 0.8315 |
| R <sup>2</sup> | <b>5.52E-07</b> |        | <b>0.999508</b> |       | <b>0.990615</b> |        |

**B:**

| Tool:          | mSINGS          |        | MSISensor       |       | MANTIS          |        |
|----------------|-----------------|--------|-----------------|-------|-----------------|--------|
|                | BI              | WUGSC  | BI              | WUGSC | BI              | WUGSC  |
| TCGA-A5-A0GG   | 0.1809          | 0.1845 | 21.95           | 21.89 | 0.4113          | 0.4125 |
| TCGA-AP-A0LS   | 0.2238          | 0.2325 | 52.36           | 51.98 | 0.8349          | 0.8278 |
| TCGA-AP-A1DK   | 0.1478          | 0.1437 | 22.9            | 23.19 | 0.5287          | 0.5307 |
| TCGA-AX-A06H   | 0.3877          | 0.3921 | 59.58           | 58.99 | 0.6032          | 0.6052 |
| TCGA-AX-A1C9   | 0.099           | 0.0938 | 33.07           | 32.22 | 0.5654          | 0.5669 |
| TCGA-AX-A2HD   | 0.3203          | 0.3333 | 70.07           | 70.04 | 0.9848          | 0.9841 |
| TCGA-B5-A11H   | 0.3792          | 0.3959 | 87.2            | 87.2  | 0.9698          | 0.9591 |
| TCGA-BG-A0VW   | 0.2254          | 0.2363 | 51.41           | 51.57 | 0.56            | 0.5592 |
| TCGA-BG-A18B   | 0.2291          | 0.2233 | 66.56           | 66.56 | 0.8074          | 0.8076 |
| TCGA-BS-A0TA   | 0.3606          | 0.3695 | 53.89           | 54.27 | 0.5834          | 0.5831 |
| TCGA-BS-A0V4   | 0.1381          | 0.1455 | 35.16           | 35.07 | 0.6156          | 0.6143 |
| TCGA-D1-A176   | 0.2303          | 0.2263 | 54.85           | 54.7  | 0.6719          | 0.6701 |
| TCGA-D1-A177   | 0.3162          | 0.3154 | 77.22           | 77.26 | 1.0279          | 1.0224 |
| TCGA-D1-A1NS   | 0.144           | 0.1502 | 22.03           | 21.57 | 0.5149          | 0.5162 |
| TCGA-D1-A2G6   | 0.0696          | 0.083  | 0.21            | 0.21  | 0.3346          | 0.3359 |
| TCGA-EC-A24G   | 0.1105          | 0.1251 | 26.8            | 26.33 | 0.5147          | 0.5184 |
| TCGA-EY-A1GF   | 0.1612          | 0.1664 | 51.19           | 50.95 | 0.7162          | 0.7119 |
| TCGA-EY-A1GU   | 0.2328          | 0.2305 | 61              | 60.66 | 0.9327          | 0.9318 |
| TCGA-EY-A1H0   | 0.3288          | 0.3239 | 67.35           | 67.39 | 0.9545          | 0.9473 |
| TCGA-EY-A215   | 0.308           | 0.3043 | 59.49           | 58.84 | 0.8958          | 0.8974 |
| R <sup>2</sup> | <b>0.994194</b> |        | <b>0.999791</b> |       | <b>0.999808</b> |        |

**Table S4:** The performance of mSINGS, MSISensor, and MANTIS over all 458 pairs from COAD/READ, UCEC, STAD, ESCA, UCS and PRAD.

|                       | <u>mSINGS</u>  |                |                |                |                |                |               |
|-----------------------|----------------|----------------|----------------|----------------|----------------|----------------|---------------|
|                       | COAD/READ      | UCEC           | STAD           | ESCA           | UCS            | PRAD           | Overall       |
| Threshold:            | 0.2            | 0.2            | 0.2            | 0.2            | 0.2            | 0.2            | 0.2           |
| TP:                   | 32             | 26             | 46             | 2              | 1              | 1              | 108           |
| FP:                   | 0              | 0              | 0              | 0              | 0              | 1              | 1             |
| TN:                   | 38             | 50             | 50             | 69             | 51             | 57             | 315           |
| FN:                   | 6              | 23             | 4              | 0              | 1              | 0              | 34            |
| <b>Sensitivity:</b>   | <b>84.21%</b>  | <b>53.06%</b>  | <b>92.00%</b>  | <b>100.00%</b> | <b>50.00%</b>  | <b>100.00%</b> | <b>76.06%</b> |
| Lower bound (95% CI): | 68.07%         | 38.42%         | 79.89%         | 19.79%         | 2.67%          | 5.46%          | 68.03%        |
| Upper bound (95% CI): | 93.41%         | 67.22%         | 97.41%         | 100.00%        | 97.33%         | 100.00%        | 82.64%        |
| <b>Specificity:</b>   | <b>100.00%</b> | <b>100.00%</b> | <b>100.00%</b> | <b>100.00%</b> | <b>100.00%</b> | <b>98.28%</b>  | <b>99.68%</b> |
| Lower bound (95% CI): | 88.57%         | 91.11%         | 91.11%         | 93.43%         | 91.27%         | 89.54%         | 97.97%        |
| Upper bound (95% CI): | 100.00%        | 100.00%        | 100.00%        | 100.00%        | 100.00%        | 99.91%         | 99.98%        |
| <b>Error rate:</b>    | <b>7.89%</b>   | <b>23.23%</b>  | <b>4.00%</b>   | <b>0.00%</b>   | <b>1.89%</b>   | <b>1.69%</b>   | <b>7.64%</b>  |
| <b>Accuracy:</b>      | <b>92.11%</b>  | <b>76.77%</b>  | <b>96.00%</b>  | <b>100.00%</b> | <b>98.11%</b>  | <b>98.31%</b>  | <b>92.36%</b> |

  

|                       | <u>MSISensor</u> |               |                |                |                |                |               |
|-----------------------|------------------|---------------|----------------|----------------|----------------|----------------|---------------|
|                       | COAD/READ        | UCEC          | STAD           | ESCA           | UCS            | PRAD           | Overall       |
| Threshold:            | 3.5              | 3.5           | 3.5            | 3.5            | 3.5            | 3.5            | 3.5           |
| TP:                   | 35               | 48            | 49             | 2              | 2              | 1              | 137           |
| FP:                   | 3                | 1             | 0              | 0              | 0              | 0              | 4             |
| TN:                   | 35               | 49            | 50             | 69             | 51             | 58             | 312           |
| FN:                   | 3                | 1             | 1              | 0              | 0              | 0              | 5             |
| <b>Sensitivity:</b>   | <b>92.11%</b>    | <b>97.96%</b> | <b>98.00%</b>  | <b>100.00%</b> | <b>100.00%</b> | <b>100.00%</b> | <b>96.48%</b> |
| Lower bound (95% CI): | 77.52%           | 87.76%        | 87.99%         | 19.79%         | 19.79%         | 5.46%          | 91.55%        |
| Upper bound (95% CI): | 97.94%           | 99.89%        | 99.90%         | 100.00%        | 100.00%        | 100.00%        | 98.70%        |
| <b>Specificity:</b>   | <b>92.11%</b>    | <b>98.00%</b> | <b>100.00%</b> | <b>100.00%</b> | <b>100.00%</b> | <b>100.00%</b> | <b>98.73%</b> |
| Lower bound (95% CI): | 77.52%           | 87.99%        | 91.11%         | 93.43%         | 91.27%         | 92.26%         | 96.57%        |
| Upper bound (95% CI): | 97.94%           | 99.90%        | 100.00%        | 100.00%        | 100.00%        | 100.00%        | 99.59%        |
| <b>Error rate:</b>    | <b>7.89%</b>     | <b>2.02%</b>  | <b>1.00%</b>   | <b>0.00%</b>   | <b>0.00%</b>   | <b>0.00%</b>   | <b>1.97%</b>  |
| <b>Accuracy:</b>      | <b>92.11%</b>    | <b>97.98%</b> | <b>99.00%</b>  | <b>100.00%</b> | <b>100.00%</b> | <b>100.00%</b> | <b>98.03%</b> |

|                       | <b>MANTIS</b>    |                |                |                |                |                |                |
|-----------------------|------------------|----------------|----------------|----------------|----------------|----------------|----------------|
|                       | <b>COAD/READ</b> | <b>UCEC</b>    | <b>STAD</b>    | <b>ESCA</b>    | <b>UCS</b>     | <b>PRAD</b>    | <b>Overall</b> |
| Threshold:            | 0.4              | 0.4            | 0.4            | 0.4            | 0.4            | 0.4            | 0.4            |
| TP:                   | 38               | 45             | 50             | 2              | 2              | 1              | 138            |
| FP:                   | 1                | 0              | 0              | 0              | 0              | 0              | 1              |
| TN:                   | 37               | 50             | 50             | 69             | 51             | 58             | 315            |
| FN:                   | 0                | 4              | 0              | 0              | 0              | 0              | 4              |
| <b>Sensitivity:</b>   | <b>100.00%</b>   | <b>91.84%</b>  | <b>100.00%</b> | <b>100.00%</b> | <b>100.00%</b> | <b>100.00%</b> | <b>97.18%</b>  |
| Lower bound (95% CI): | 88.57%           | 79.52%         | 91.11%         | 19.79%         | 19.79%         | 5.46%          | 92.50%         |
| Upper bound (95% CI): | 100.00%          | 97.35%         | 100.00%        | 100.00%        | 100.00%        | 100.00%        | 99.09%         |
| <b>Specificity:</b>   | <b>97.37%</b>    | <b>100.00%</b> | <b>100.00%</b> | <b>100.00%</b> | <b>100.00%</b> | <b>100.00%</b> | <b>99.68%</b>  |
| Lower bound (95% CI): | 84.57%           | 91.11%         | 91.11%         | 93.43%         | 91.27%         | 92.26%         | 97.97%         |
| Upper bound (95% CI): | 99.86%           | 100.00%        | 100.00%        | 100.00%        | 100.00%        | 100.00%        | 99.98%         |
| <b>Error rate:</b>    | <b>1.32%</b>     | <b>4.04%</b>   | <b>0.00%</b>   | <b>0.00%</b>   | <b>0.00%</b>   | <b>0.00%</b>   | <b>1.09%</b>   |
| <b>Accuracy:</b>      | <b>98.68%</b>    | <b>95.96%</b>  | <b>100.00%</b> | <b>100.00%</b> | <b>100.00%</b> | <b>100.00%</b> | <b>98.91%</b>  |



**Figure S4: The performance of mSINGS, MSISensor and MANTIS with lists of top-performing loci.** For each tool, and within the COAD/READ, UCEC and STAD samples, the top-performing loci were determined, and the performance of each tool was evaluated with lists of top loci of varying length. The results with 2539 loci (without loci shortlisting) are included for reference. Results are broken down by cancer type.

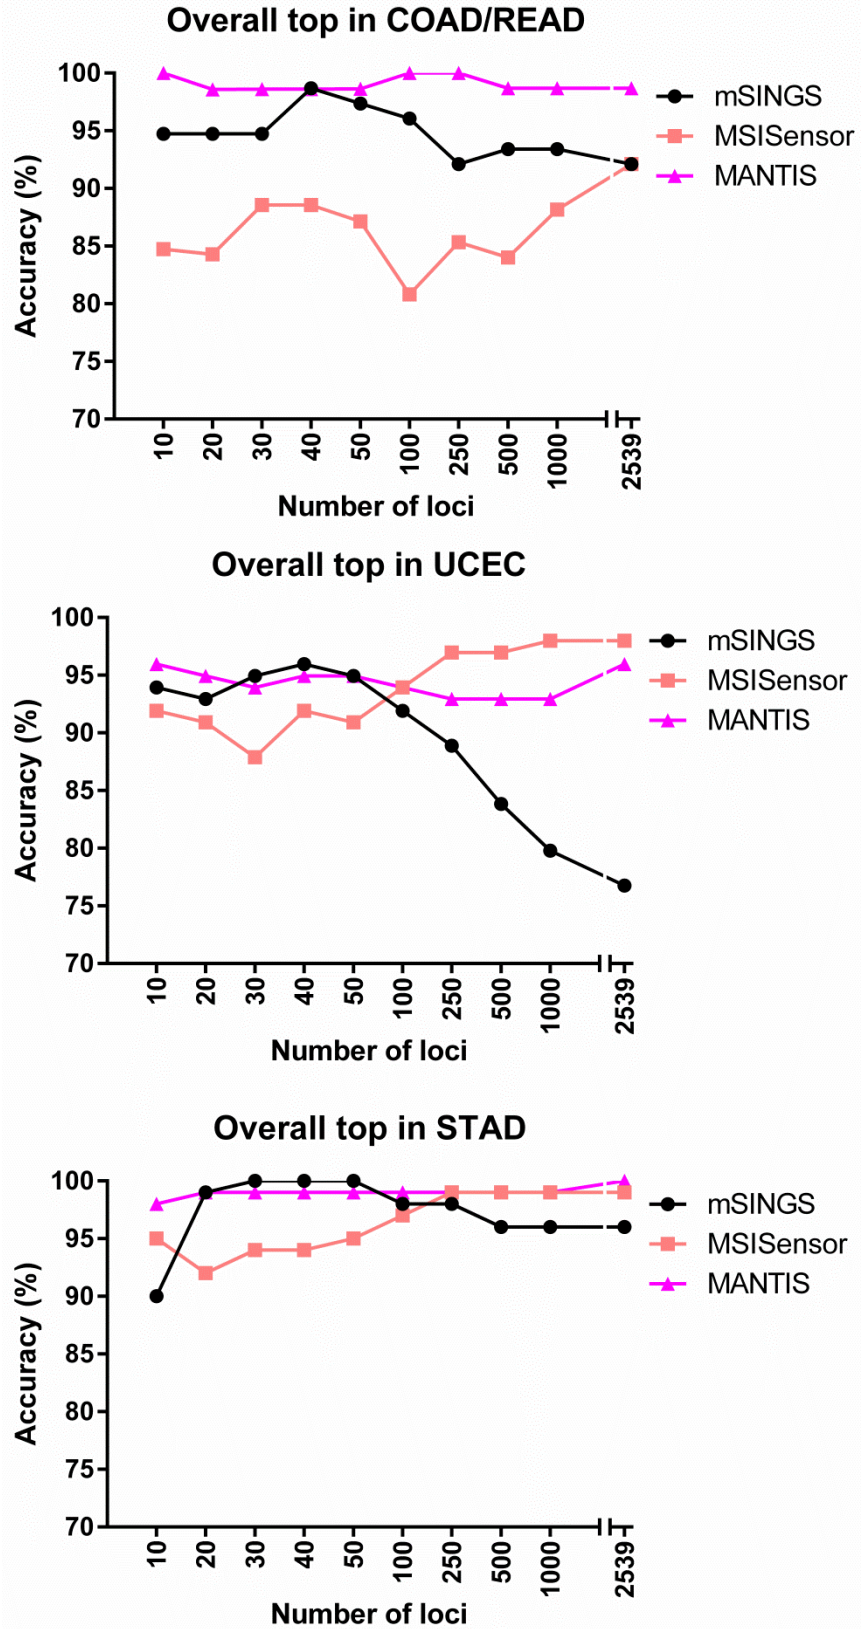



#### Supplemental Files:

- S1: Summary of the TCGA (The Cancer Genome Atlas) and SU2C (Stand Up To Cancer) data used for main comparisons.
- S2: mSINGS, MSISensor and MANTIS scores for all 458 pairs used for testing and analysis of MSI calling tools. The results from the 24 pairs used for sequencing center comparison (see Supplemental Table S5) are not included.
- S3: Summary of the TCGA data used for tool comparisons by sequencing center.
- S4: The performance of each locus assessed with mSINGS, MSISensor and MANTIS, within COAD/READ, UCEC, STAD, and all three cancer types taken together. Note that locus performance scores from MANTIS are not directly comparable to those from mSINGS or MSISensor, due to the different algorithms used by each.
- S5: Performance of mSINGS, MSISensor and MANTIS in COAD/READ, UCEC and STAD, with each list of top loci (10, 20, 30, 40, 50, 100, 250, 500 or 1000, from COAD/READ, UCEC, STAD or overall, in COAD/READ, UCEC, STAD or overall, with mSINGS, MSISensor or MANTIS).
